# Supplementary material for: Sugar nucleotide recognition by Klebsiella pneumoniae UDP-d-galactopyranose mutase: Fluorinated substrates, kinetics and equilibria
Source: Royal Society of Chemistry journal article supplement (doi:10.1039/b815549f), 2009-01-01
Supplement: b815549f.pdf [file b815549f.pdf]

# **B815549F**

**Sugar Nucleotide Recognition by *Klebsiella pneumoniae* UDP-D-Galactopyranose Mutase: Fluorinated Substrates, Kinetics and Equilibria.**

**James C. Errey,<sup>1</sup> Maretta C. Mann, Shirley A. Fairhurst, Lionel Hill, Michael R. McNeil, James H. Naismith, Jonathan M. Percy, Chris Whitfield and Robert A. Field\***

**Contact: [rob.field@bbsrc.ac.uk](mailto:rob.field@bbsrc.ac.uk)**

**<sup>1</sup>H and <sup>13</sup>C NMR data for intermediates 2 and 3**

#01\_49

Archive directory: /export/home/walkup/vnmrsys/data  
Sample directory: auto\_12May2003

Pulse Sequence: s2pu1

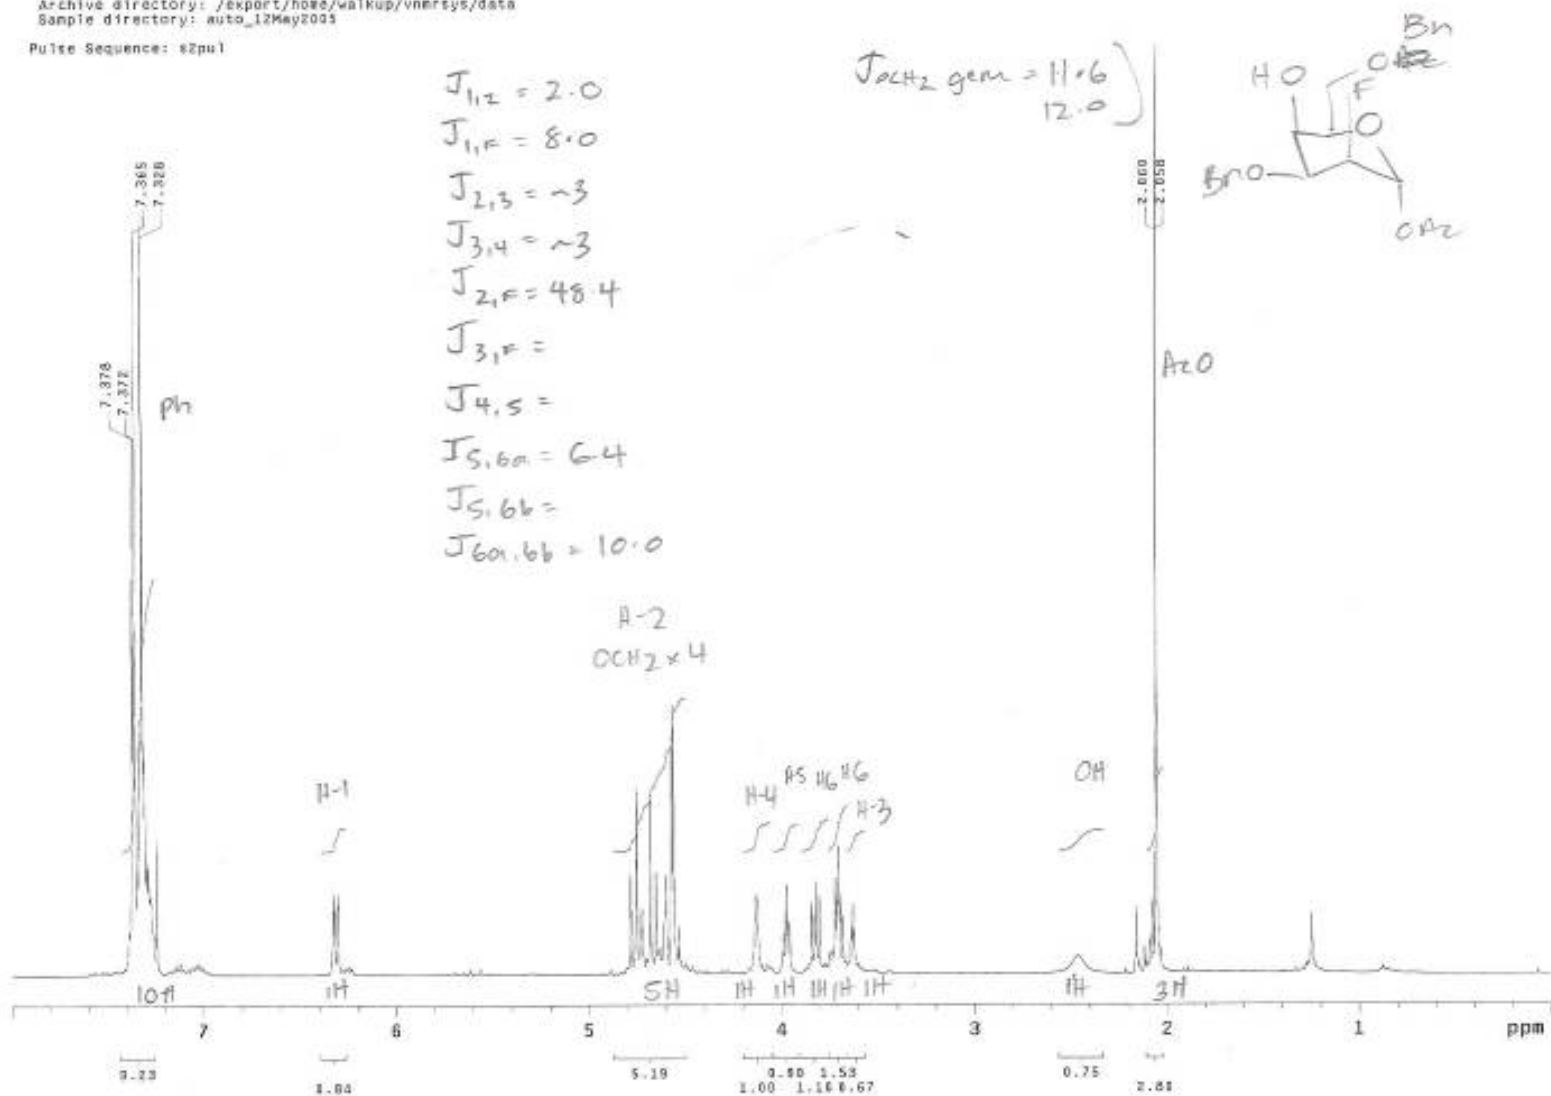

Compound 2

nm01\_49

Archive directory: /export/home/walkup/vnmrsys/data  
Sample directory: auto\_12May2005

Pulse Sequence: s2pul

Assignment:

- 168.3 (OAc carbonyl)
- 137.8, 136.9 (2 x Ph ipso)
- 128.6, 128.4, 128.2, 127.9, 127.8 (Ph)
- 91.2 (J=32.6, C-1)
- 86.2 (J=179.8, C-2)
- 73.7 (OCH<sub>2</sub>)
- 72.4 (CS)
- 71.4 (J=15.1, C-3)
- 70.1 (OCH<sub>2</sub>)
- 68.7 (C-6)
- 66.0 (C-4)
- 20.8 (AcO)

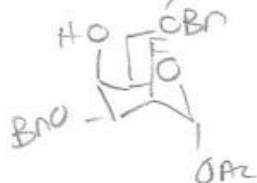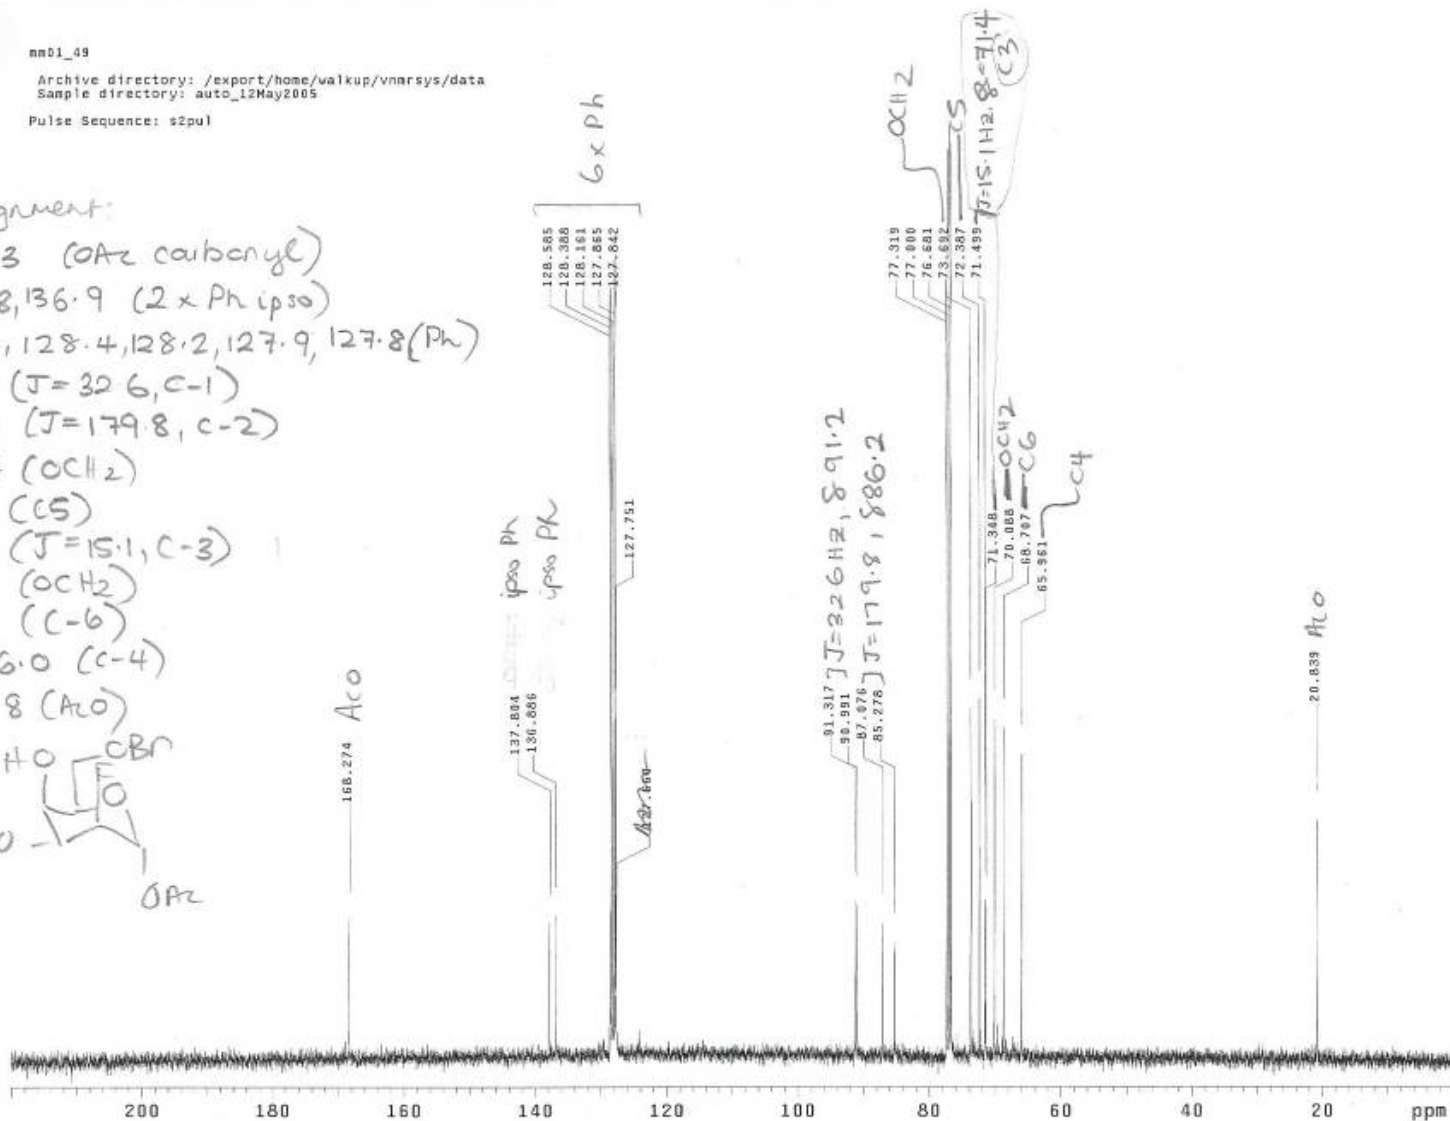

Compound 2

mn01\_53

Archive directory: /export/hons/walkup/vnmrsys/data  
Sample directory: auto\_27May2005

Pulse Sequence: s2pu1

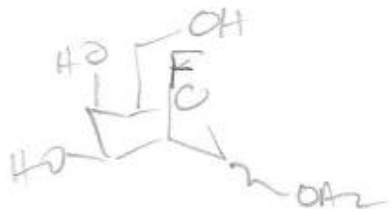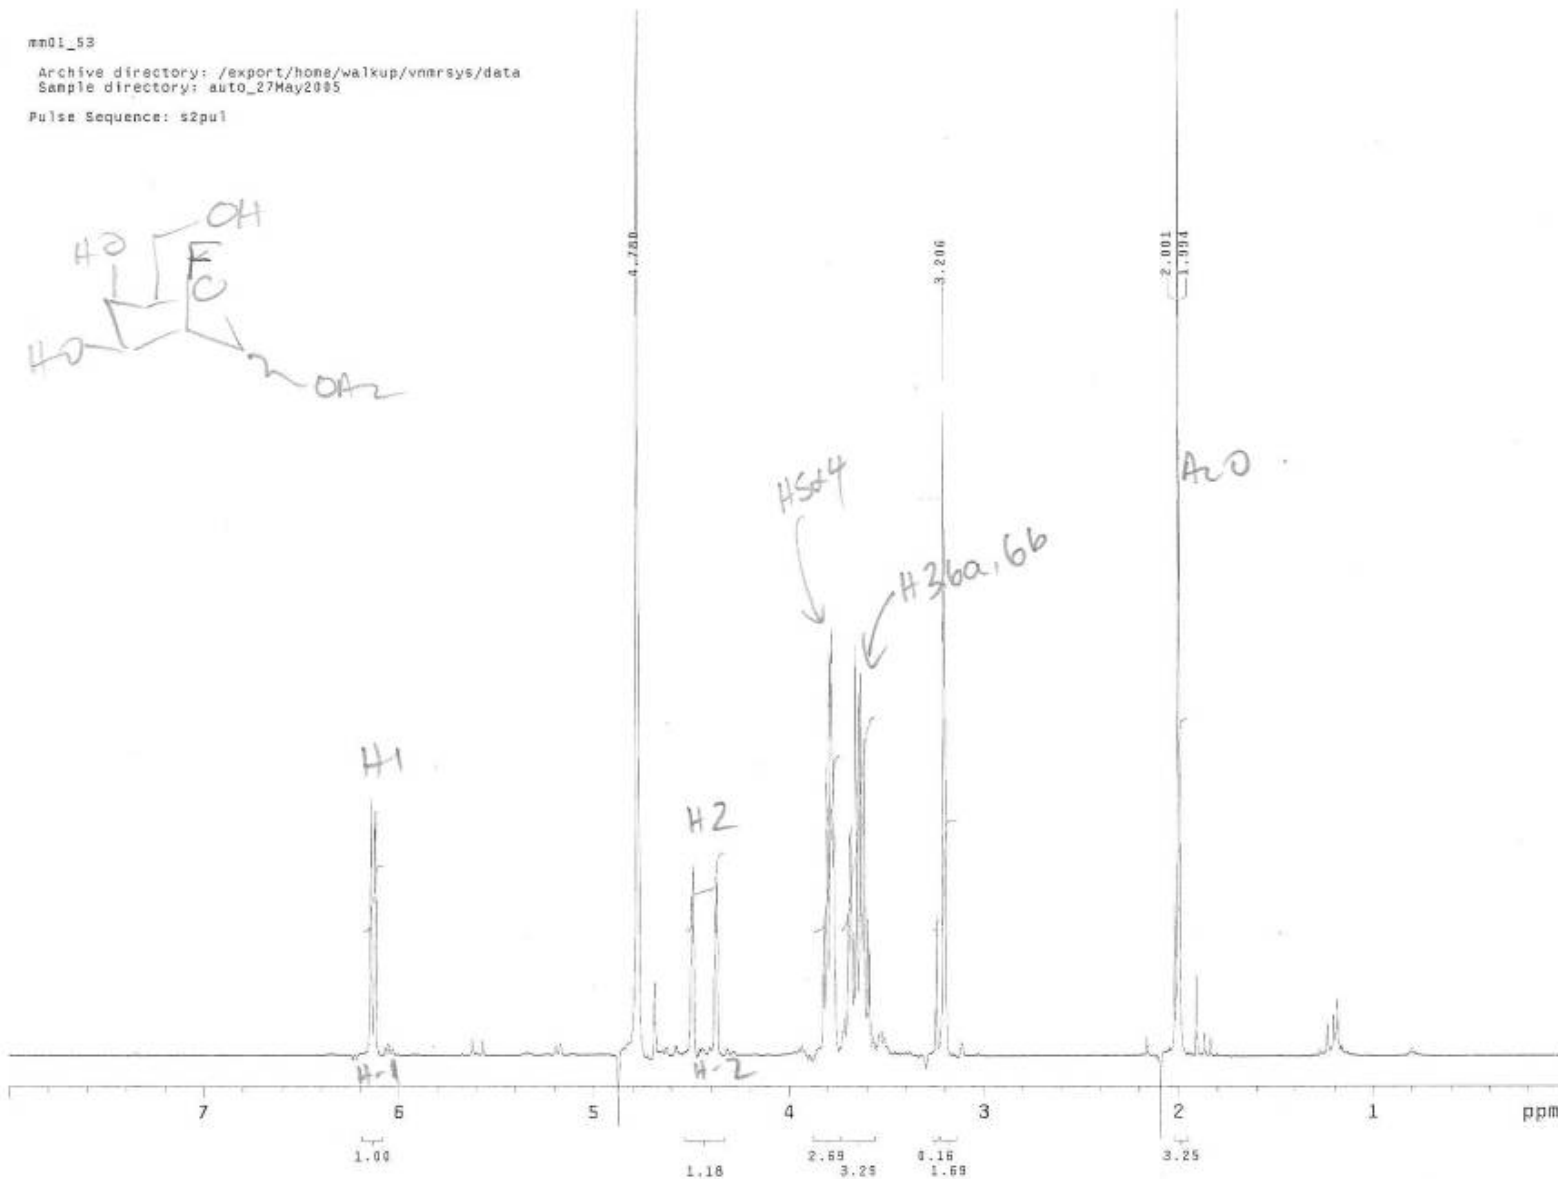

**Compound 3**

nn01\_53

Archive directory: /export/home/walkup/vnhrsyst/data  
Sample directory: auto\_27May2005

Pulse Sequence: s2pul

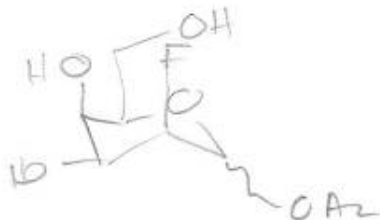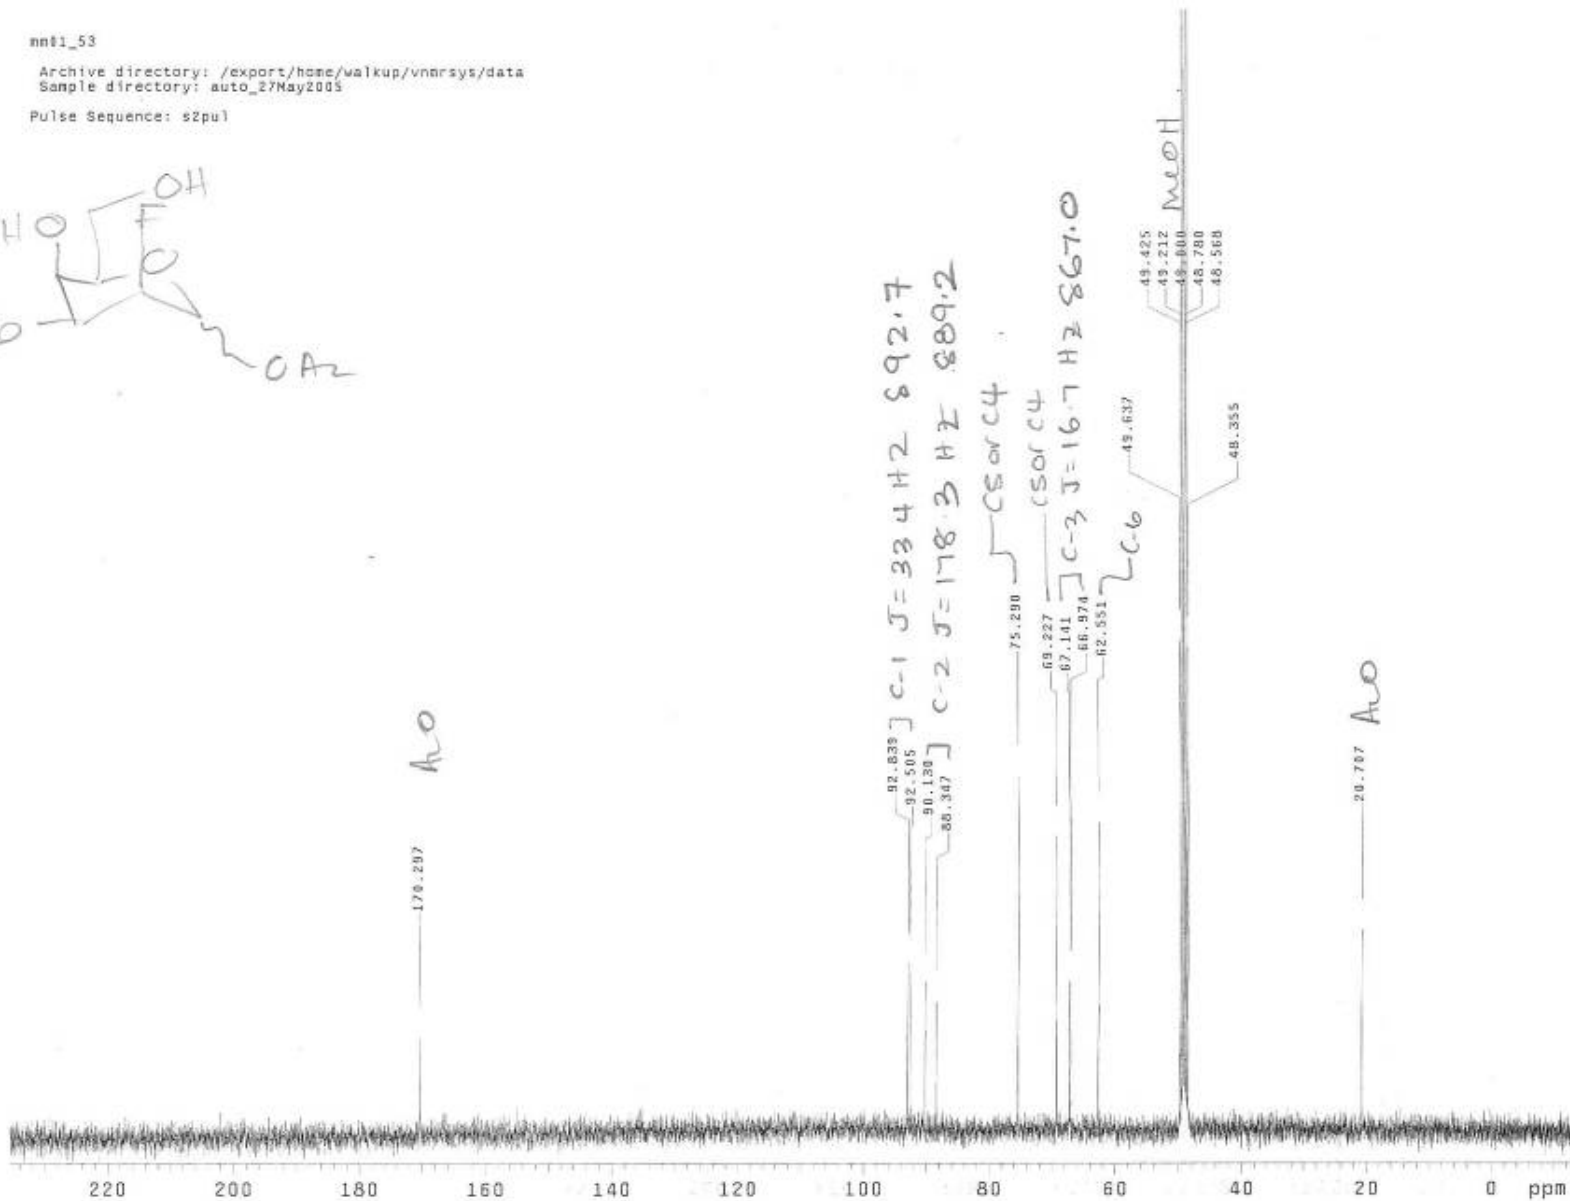

Compound 3
